# Supplementary material
Source: MDPI journal article supplement (https://www.mdpi.com/2073-4441/15/12/2276)
Supplement: s1 [file s1]

## Supplementary data

**Table S1:** Examples of pathways that may be altered at the transcriptional level by exposure to Glyphosate (CAS# 1071-83-6) in zebrafish (*Danio rerio*) using the Comparative Toxicogenomics Database (March/2023) [1].

| Bibliographic Reference | Phenotype                                   | Phenotype ID | Co-Mentioned Terms | Interaction of glyphosate                                        | Anatomy              | Possible interaction (genes/proteins)                                                  | References interrelation |
|-------------------------|---------------------------------------------|--------------|--------------------|------------------------------------------------------------------|----------------------|----------------------------------------------------------------------------------------|--------------------------|
| [2]                     | Oviposition                                 | GO:0018991   |                    | Affects oviposition                                              | Embryo, Nonmammalian | RACK1                                                                                  | [3]                      |
|                         | Hatching                                    | GO:0035188   |                    | Results in increased hatching                                    |                      | CD63                                                                                   | [3]                      |
|                         | Regulation of steroid biosynthetic process  | GO:0050810   |                    | Affects regulation of steroid biosynthetic process               |                      | DDX20                                                                                  | [4]                      |
|                         |                                             |              |                    |                                                                  |                      | LEP                                                                                    | [5]                      |
|                         |                                             |              |                    |                                                                  |                      | NR5A1                                                                                  | [6]                      |
|                         |                                             |              |                    | STAR                                                             | [7]                  |                                                                                        |                          |
| [6]                     | Oocyte growth                               | GO:0001555   |                    | Affects oocyte growth                                            | Ovary                | KMT2D                                                                                  | [8]                      |
|                         |                                             |              |                    |                                                                  |                      | NANOS3                                                                                 | [9]                      |
| [10]                    | Locomotion involved in locomotory behaviour | GO:0031987   |                    | Results in decreased locomotion involved in locomotory behaviour |                      | FZD4                                                                                   | [11]                     |
|                         |                                             |              |                    |                                                                  |                      | PPP3CB                                                                                 | [3]                      |
|                         | Memory                                      | GO:0007613   |                    | Results in decreased memory                                      |                      | APP / CASP1 / IGF1                                                                     | [12]                     |
|                         |                                             |              |                    |                                                                  |                      | ATXN1 / KMT2B                                                                          | [8]                      |
|                         |                                             |              |                    |                                                                  |                      | B4GALT2 / KALRN / RELN / SHANK3                                                        | [13]                     |
|                         |                                             |              |                    |                                                                  |                      | CACNA1D / CREB1 / EP30 / FEN1 / FGF13 / ITGA3 / ITGA5 / ITPR3 / PLCB1 / PSEN2 / TUBA1A | [11]                     |
|                         |                                             |              |                    |                                                                  | DRD1                 | [14]                                                                                   |                          |

|      |                                                |            |                         |                                                                                                                    |                                         |                             |                    |
|------|------------------------------------------------|------------|-------------------------|--------------------------------------------------------------------------------------------------------------------|-----------------------------------------|-----------------------------|--------------------|
|      | Larval development                             | GO:0002164 |                         | Affects larval development                                                                                         |                                         | GRIN1                       | [15,16]            |
|      |                                                |            |                         |                                                                                                                    |                                         | HDAC4                       | [5]                |
|      |                                                |            |                         |                                                                                                                    |                                         | IL1B                        | [17]               |
|      |                                                |            |                         |                                                                                                                    |                                         | OXT                         | [18]               |
|      |                                                |            |                         |                                                                                                                    |                                         | PLK2                        | [4]                |
|      |                                                |            |                         |                                                                                                                    |                                         | PPP3CB                      | [3]                |
|      |                                                |            |                         |                                                                                                                    |                                         | PTGS1                       | [19]               |
|      |                                                |            |                         |                                                                                                                    |                                         | S100B                       | [20,21]            |
|      |                                                |            |                         |                                                                                                                    |                                         | SLC6A1                      | [22]               |
| [24] | Aggressive behaviour                           | GO:0002118 |                         | Results in decreased aggressive behaviour                                                                          |                                         | SLC6A4                      | [15]               |
|      |                                                |            |                         |                                                                                                                    |                                         | TH                          | [23]               |
|      |                                                |            |                         |                                                                                                                    |                                         | FMO-2                       | [25]               |
|      |                                                |            |                         |                                                                                                                    |                                         |                             |                    |
|      |                                                |            |                         |                                                                                                                    |                                         |                             |                    |
|      |                                                |            |                         |                                                                                                                    |                                         |                             |                    |
|      |                                                |            |                         |                                                                                                                    |                                         |                             |                    |
|      |                                                |            |                         |                                                                                                                    |                                         |                             |                    |
|      |                                                |            |                         |                                                                                                                    |                                         |                             |                    |
| [24] | Cellular metabolic process                     | GO:0044237 |                         | Results in decreased cellular metabolic process                                                                    | Brain / Cells / Cultured                |                             |                    |
|      |                                                |            |                         |                                                                                                                    |                                         |                             |                    |
|      |                                                |            |                         |                                                                                                                    |                                         |                             |                    |
| [24] | NADH dehydrogenase (ubiquinone) activity       | GO:0008137 |                         | Results in decreased NADH dehydrogenase (ubiquinone) activity                                                      | Brain                                   | ND1 / ND2 / ND4 / ND5 / ND6 | [26]               |
|      |                                                |            |                         |                                                                                                                    |                                         | ND3                         | [8]                |
|      |                                                |            |                         |                                                                                                                    |                                         | NDUFA6                      | [24]               |
| [24] | Cytochrome-c oxidase activity                  | GO:0004129 |                         | Results in decreased cytochrome-c oxidase activity                                                                 | Brain                                   | COX1 / COX2                 | [27]               |
| [24] | Regulation of mitochondrial membrane potential | GO:0051881 |                         | Affects regulation of mitochondrial membrane potential                                                             | Brain / Cells / Mitochondrial Membranes | BAX                         | [9,11,12,28-33]    |
|      |                                                |            |                         |                                                                                                                    |                                         | BCL2                        | [9,12,28-34]       |
|      |                                                |            |                         |                                                                                                                    |                                         | BCL2L1                      | [3]                |
|      |                                                |            |                         |                                                                                                                    |                                         | SOD1                        | [2,21,29,35]       |
|      |                                                |            |                         |                                                                                                                    |                                         | SOD2                        | [31]               |
|      |                                                |            |                         |                                                                                                                    |                                         | UBB                         | [4]                |
| [24] | Reactive oxygen species metabolic process      | GO:0072593 | Reactive Oxygen Species | Affects reactive oxygen species metabolic process, which results in increased abundance of Reactive Oxygen Species | Brain / Cells                           | BCL2                        | [9,12,28-34]       |
|      |                                                |            |                         |                                                                                                                    |                                         | BNIP3                       | [11]               |
|      |                                                |            |                         |                                                                                                                    |                                         | CAT                         | [2,19,20,23,36-43] |
|      |                                                |            |                         |                                                                                                                    |                                         | DDIT4                       | [5,11]             |
|      |                                                |            |                         |                                                                                                                    |                                         | ND2                         | [26]               |
|      |                                                |            |                         |                                                                                                                    |                                         | PMAIP1                      | [11,28]            |
|      |                                                |            |                         |                                                                                                                    |                                         | SESN2                       | [44]               |
|      |                                                |            |                         |                                                                                                                    |                                         | SOD1                        | [2,21,29,35]       |
|      |                                                |            |                         |                                                                                                                    |                                         | SOD2                        | [31]               |
|      |                                                |            |                         |                                                                                                                    |                                         | TP53                        | [5,12,28,34]       |

|      |                                  |            |  |                                            |                         |                                      |                  |
|------|----------------------------------|------------|--|--------------------------------------------|-------------------------|--------------------------------------|------------------|
|      |                                  |            |  |                                            |                         | <i>TRP53</i>                         | [45]             |
| [24] | Exploration behaviour            | GO:0035640 |  | Results in decreased exploration behaviour |                         | <i>ABAT</i>                          | [26]             |
|      |                                  |            |  |                                            |                         | <i>ITGA3</i>                         | [11]             |
|      |                                  |            |  |                                            |                         | <i>SHANK3</i>                        | [13]             |
|      |                                  |            |  |                                            |                         | <i>CAZ</i>                           | [26]             |
| [46] | Larval locomotory behaviour      | GO:0008345 |  | Affects larval locomotory behaviour        | Embryo / Nonmammalian   |                                      |                  |
| [46] | Regulation of membrane potential | GO:0042391 |  | Affects regulation of membrane potential   | Mesencephalon / Neurons | <i>ASIC2 / NEDD4L / SLC4A8</i>       | [13]             |
|      |                                  |            |  |                                            |                         | <i>GRIN1</i>                         | [15,16]          |
| [46] | Microglial cell activation       | GO:0001774 |  | Affects microglial cell activation         | Microglia               | <i>APP / CASP1 / SNCA</i>            | [12]             |
|      |                                  |            |  |                                            |                         | <i>CLU</i>                           | [4]              |
|      |                                  |            |  |                                            |                         | <i>IFNG</i>                          | [12,47]          |
|      |                                  |            |  |                                            |                         | <i>IFNGR1 / JUN</i>                  | [11]             |
|      |                                  |            |  |                                            |                         | <i>IL13</i>                          | [47]             |
|      |                                  |            |  |                                            |                         | <i>TNF</i>                           | [12,16,17,28,48] |
| [23] | Adult locomotory behaviour       | GO:0008344 |  | Affects adult locomotory behaviour         |                         | <i>APP</i>                           | [12]             |
|      |                                  |            |  |                                            |                         | <i>ATXN1</i>                         | [8]              |
|      |                                  |            |  |                                            |                         | <i>CAZ</i>                           | [26]             |
|      |                                  |            |  |                                            |                         | <i>CXCL12</i>                        | [3,49]           |
|      |                                  |            |  |                                            |                         | <i>ENPP1</i>                         | [13]             |
|      |                                  |            |  |                                            |                         | <i>GRIN1</i>                         | [15,16]          |
|      |                                  |            |  |                                            |                         | <i>ID2</i>                           | [11]             |
|      |                                  |            |  |                                            |                         | <i>INPP5F</i>                        | [4]              |
|      |                                  |            |  |                                            |                         | <i>KALRN / MSR1 / NTF4 / PCDH15</i>  | [13]             |
|      |                                  |            |  |                                            |                         | <i>PMP22</i>                         | [26]             |
|      |                                  |            |  |                                            |                         | <i>PPT1</i>                          | [8]              |
|      |                                  |            |  |                                            |                         | <i>SNCA</i>                          | [12]             |
|      |                                  |            |  |                                            |                         | <i>TSC1 / TUBA1A</i>                 | [11]             |
| [23] | Social behaviour                 | GO:0035176 |  | Affects social behaviour                   |                         | <i>ATXN1</i>                         | [8]              |
|      |                                  |            |  |                                            |                         | <i>CHD8</i>                          | [11]             |
|      |                                  |            |  |                                            |                         | <i>DRD1</i>                          | [14]             |
|      |                                  |            |  |                                            |                         | <i>GRIN1</i>                         | [15,16]          |
|      |                                  |            |  |                                            |                         | <i>IL1B</i>                          | [17]             |
|      |                                  |            |  |                                            |                         | <i>KALRN / NRXN1 / RELN / SHANK3</i> | [13]             |
|      |                                  |            |  |                                            |                         | <i>MTOR</i>                          | [11,15]          |
|      |                                  |            |  |                                            |                         | <i>OXT</i>                           | [18]             |
|      |                                  |            |  |                                            |                         | <i>RPTOR</i>                         | [11]             |
|      |                                  |            |  |                                            |                         | <i>SLC6A4</i>                        | [15]             |

|      |                                    |            |                                |                                                                                                                    |                                                       |                            |              |
|------|------------------------------------|------------|--------------------------------|--------------------------------------------------------------------------------------------------------------------|-------------------------------------------------------|----------------------------|--------------|
|      |                                    |            |                                |                                                                                                                    |                                                       | <i>TH</i>                  | [23]         |
| [23] | Neurotransmitter metabolic process | GO:0042133 | 3,4-Dihydroxyphenylacetic Acid | Affects neurotransmitter metabolic process, which results in increased abundance of 3,4-Dihydroxyphenylacetic Acid | Telencephalon / Optic Lobe, Nonmammalian / Cerebellum | <i>GLUL</i>                | [37]         |
| [23] | Neurotransmitter metabolic process | GO:0042133 | Dopamine                       | Affects neurotransmitter metabolic process, which results in increased abundance of Dopamine                       | Telencephalon                                         | <i>GLUL</i>                | [37]         |
| [23] | Neurotransmitter metabolic process | GO:0042133 | Norepinephrine                 | Affects neurotransmitter metabolic process, which affects the abundance of Norepinephrine                          | Telencephalon / Optic Lobe, Nonmammalian / Cerebellum | <i>GLUL</i>                | [37]         |
| [23] | Neurotransmitter metabolic process | GO:0042133 | Homovanillic Acid              | Affects neurotransmitter metabolic process, which results in increased abundance of Homovanillic Acid              | Telencephalon / Optic Lobe, Nonmammalian / Cerebellum | <i>GLUL</i>                | [37]         |
| [23] | Neurotransmitter metabolic process | GO:0042133 | Serotonin                      | Affects neurotransmitter metabolic process, which results in increased abundance of Serotonin                      | Telencephalon                                         | <i>GLUL</i>                | [37]         |
| [23] | Superoxide dismutase activity      | GO:0004784 |                                | Increased superoxide dismutase activity                                                                            | Brain                                                 | <i>NQO1</i>                | [42]         |
|      |                                    |            |                                |                                                                                                                    |                                                       | <i>SOD1</i>                | [2,21,29,35] |
|      |                                    |            |                                |                                                                                                                    |                                                       | <i>SOD2</i>                | [31]         |
|      |                                    |            |                                |                                                                                                                    |                                                       | <i>SOD3</i>                | [4]          |
| [23] | Glutamate-cysteine ligase activity | GO:0004357 |                                | Decreased glutamate-cysteine ligase activity                                                                       | Brain                                                 | <i>GCLM</i>                | [42]         |
| [23] |                                    | GO:0006749 | Glutathione                    | Affects glutathione metabolic process -                                                                            | Brain                                                 | <i>CLIC5</i>               | [13]         |
|      |                                    |            |                                |                                                                                                                    |                                                       | <i>CTH / GSTK1 / OPLAH</i> | [4]          |

|      |                               |            |  |                                                                                           |                                      |                                      |                    |
|------|-------------------------------|------------|--|-------------------------------------------------------------------------------------------|--------------------------------------|--------------------------------------|--------------------|
|      | Glutathione metabolic process |            |  | which results in decreased abundance of Glutathione                                       |                                      | <i>DPEP1 / GGT1</i>                  | [26]               |
|      |                               |            |  |                                                                                           |                                      | <i>G6PD</i>                          | [29,35,41]         |
|      |                               |            |  |                                                                                           |                                      | <i>GCLM</i>                          | [42]               |
|      |                               |            |  |                                                                                           |                                      | <i>GPX1</i>                          | [19,38,42]         |
|      |                               |            |  |                                                                                           |                                      | <i>GPX3</i>                          | [31]               |
|      |                               |            |  |                                                                                           |                                      | <i>GSR</i>                           | [41]               |
|      |                               |            |  |                                                                                           |                                      | <i>GSTM1</i>                         | [28]               |
|      |                               |            |  |                                                                                           |                                      | <i>HBB</i>                           | [27]               |
|      |                               |            |  |                                                                                           |                                      | <i>SOD1</i>                          | [2,21,29,35]       |
|      |                               |            |  |                                                                                           |                                      | <i>SOD2</i>                          | [31]               |
| [23] | Lipid catabolic process       | GO:0016042 |  | Affects lipid catabolic process – which results in increased abundance of Malondialdehyde | Brain                                | <i>ABHD2 / LIPH</i>                  | [49]               |
|      |                               |            |  |                                                                                           |                                      | <i>ABHD4</i>                         | [22]               |
|      |                               |            |  |                                                                                           |                                      | <i>IRS1 / PLCB1 / PLD1 / TBL1XR1</i> | [11]               |
|      |                               |            |  |                                                                                           |                                      | <i>LIP1 / PLCE1</i>                  | [13]               |
|      |                               |            |  |                                                                                           |                                      | <i>LIPO1 / PPT1</i>                  | [8]                |
|      |                               |            |  |                                                                                           |                                      | <i>PNPLA4</i>                        | [22]               |
| [50] | Aerobic respiration           | GO:0009060 |  | Results in decreased aerobic respiration                                                  | Embryo / Nonmammalian / Mitochondria | <i>ATP5F1D</i>                       | [8]                |
|      |                               |            |  |                                                                                           |                                      | <i>CAT</i>                           | [2,19,20,23,36-43] |
|      |                               |            |  |                                                                                           |                                      | <i>COX1</i>                          | [27]               |
|      |                               |            |  |                                                                                           |                                      | <i>ND1 / ND2 / ND4 / ND5 / ND6</i>   | [26]               |
|      |                               |            |  |                                                                                           |                                      | <i>ND3</i>                           | [8]                |
|      |                               |            |  |                                                                                           |                                      | <i>NDUFA6</i>                        | [24]               |
|      |                               |            |  |                                                                                           |                                      | <i>NDUFB11</i>                       | [4]                |
|      |                               |            |  |                                                                                           |                                      | <i>SDHC</i>                          | [8,24]             |

## References

1. Davis, A.P.; Grondin, C.J.; Johnson, R.J.; Sciaky, D.; Wiegers, J.; Wiegers, T.C.; Mattingly, C.J. Comparative toxicogenomics database (CTD): update 2021. *Nucleic Acids Res.* **2021**, *49*, D1138-D1143.
2. Uren Webster, T.M.; Laing, L.V.; Florance, H.; Santos, E.M. Effects of glyphosate and its formulation, roundup, on reproduction in zebrafish (*Danio rerio*). *Environ. Sci. Technol.* **2014**, *48*, 1271-1279.
3. Hokanson, R.; Fudge, R.; Chowdhary, R.; Busbee, D. Alteration of estrogen-regulated gene expression in human cells induced by the agricultural and horticultural herbicide glyphosate. *Hum. Exp. Toxicol.* **2007**, *26*, 747-752.
4. Mesnage, R.; Teixeira, M.; Mandrioli, D.; Falcioni, L.; Ibragim, M.; Ducarmon, Q.R.; Zwartink, R.D.; Amiel, C.; Panoff, J.-M.; Bourne, E. Multi-omics phenotyping of the gut-liver axis reveals metabolic perturbations from a low-dose pesticide mixture in rats. *Commun. Biol.* **2021**, *4*, 1-14.
5. Uren Webster, T.M.; Santos, E.M. Global transcriptomic profiling demonstrates induction of oxidative stress and of compensatory cellular stress responses in brown trout exposed to glyphosate and Roundup. *BMC Genom.* **2015**, *16*, 1-14.
6. Armiliato, N.; Ammar, D.; Nezzi, L.; Stralio, M.; Muller, Y.M.; Nazari, E.M. Changes in ultrastructure and expression of steroidogenic factor-1 in ovaries of zebrafish *Danio rerio* exposed to glyphosate. *J. Toxicol. Environ. Health, A* **2014**, *77*, 405-414.
7. Walsh, L.P.; McCormick, C.; Martin, C.; Stocco, D.M. Roundup inhibits steroidogenesis by disrupting steroidogenic acute regulatory (StAR) protein expression. *Environ. Health Perspect.* **2000**, *108*, 769-776.
8. Mesnage, R.; Arno, M.; Costanzo, M.; Malatesta, M.; Séralini, G.-E.; Antoniou, M.N. Transcriptome profile analysis reflects rat liver and kidney damage following chronic ultra-low dose Roundup exposure. *Environ. Health* **2015**, *14*, 1-14.
9. Pham, T.H.; Derian, L.; Kervarrec, C.; Kernanec, P.-Y.; Jegou, B.; Smagulova, F.; Gely-Pernot, A. Perinatal exposure to glyphosate and a glyphosate-based herbicide affect spermatogenesis in mice. *Toxicol. Sci.* **2019**, *169*, 260-271.
10. Bridi, D.; Altenhofen, S.; Gonzalez, J.B.; Reolon, G.K.; Bonan, C.D. Glyphosate and Roundup® alter morphology and behavior in zebrafish. *Toxicology* **2017**, *392*, 32-39.
11. Stur, E.; Aristizabal-Pachon, A.F.; Peronni, K.C.; Agostini, L.P.; Waigel, S.; Chariker, J.; Miller, D.M.; Thomas, S.D.; Rezzoug, F.; Detogni, R.S. Glyphosate-based herbicides at low doses affect canonical pathways in estrogen positive and negative breast cancer cell lines. *PLoS One* **2019**, *14*, e0219610.
12. Martínez, M.-A.; Rodríguez, J.-L.; Lopez-Torres, B.; Martínez, M.; Martínez-Larrañaga, M.-R.; Maximiliano, J.-E.; Anadón, A.; Ares, I. Use of human neuroblastoma SH-SY5Y cells to evaluate glyphosate-induced effects on oxidative stress, neuronal development and cell death signaling pathways. *Environ. Int.* **2020**, *135*, 105414.
13. Kubsad, D.; Nilsson, E.E.; King, S.E.; Sadler-Riggelman, I.; Beck, D.; Skinner, M.K. Assessment of glyphosate induced epigenetic transgenerational inheritance of pathologies and sperm epimutations: generational toxicology. *Sci. Rep.* **2019**, *9*, 1-17.
14. Hernández-Plata, I.; Giordano, M.; Díaz-Muñoz, M.; Rodríguez, V.M. The herbicide glyphosate causes behavioral changes and alterations in dopaminergic markers in male Sprague-Dawley rat. *Neurotoxicology* **2015**, *46*, 79-91.

15. Li, X.; Cheng, W.; Yang, S.; Liang, F.; Wang, H.; Feng, Y.; Wang, Y. Establishment of a 13 genes-based molecular prediction score model to discriminate the neurotoxic potential of food relevant-chemicals. *Toxicol. Lett.* **2022**, *355*, 1-18.
16. Ait-Bali, Y.; Ba-M'hamed, S.; Gambarotta, G.; Sassoè-Pognetto, M.; Giustetto, M.; Bennis, M. Pre-and postnatal exposure to glyphosate-based herbicide causes behavioral and cognitive impairments in adult mice: Evidence of cortical and hippocampal dysfunction. *Arch. Toxicol.* **2020**, *94*, 1703-1723.
17. Tang, Q.; Tang, J.; Ren, X.; Li, C. Glyphosate exposure induces inflammatory responses in the small intestine and alters gut microbial composition in rats. *Environ. Pollut.* **2020**, *261*, 114129.
18. Wrobel, M.H. Glyphosate affects the secretion of regulators of uterine contractions in cows while it does not directly impair the motoric function of myometrium in vitro. *Toxicol. Appl. Pharmacol.* **2018**, *349*, 55-61.
19. de Souza, J.S.; Laureano-Melo, R.; Herai, R.H.; da Conceicao, R.R.; Oliveira, K.C.; da Silva, I.D.C.G.; Dias-da-Silva, M.R.; Romano, R.M.; Romano, M.A.; de Barros Maciel, R.M. Maternal glyphosate-based herbicide exposure alters antioxidant-related genes in the brain and serum metabolites of male rat offspring. *Neurotoxicology* **2019**, *74*, 121-131.
20. Cattani, D.; Cesconetto, P.A.; Tavares, M.K.; Parisotto, E.B.; De Oliveira, P.A.; Rieg, C.E.H.; Leite, M.C.; Prediger, R.D.S.; Wendt, N.C.; Razzera, G. Developmental exposure to glyphosate-based herbicide and depressive-like behavior in adult offspring: Implication of glutamate excitotoxicity and oxidative stress. *Toxicology* **2017**, *387*, 67-80.
21. Masood, M.I.; Naseem, M.; Warda, S.A.; Tapia-Laliena, M.Á.; ur Rehman, H.; Nasim, M.J.; Schäfer, K.H. Environment permissible concentrations of glyphosate in drinking water can influence the fate of neural stem cells from the subventricular zone of the postnatal mouse. *Environ. Pollut.* **2021**, *270*, 116179.
22. Uchida, M.; Takumi, S.; Tachikawa, K.; Yamauchi, R.; Goto, Y.; Matsusaki, H.; Nakamura, H.; Kagami, Y.; Kusano, T.; Arizono, K. Toxicity evaluation of glyphosate agrochemical components using Japanese medaka (*Oryzias latipes*) and DNA microarray gene expression analysis. *J. Toxicol. Sci.* **2012**, *37*, 245-254.
23. Faria, M.; Bedrossiantz, J.; Ramírez, J.R.R.; Mayol, M.; García, G.H.; Bellot, M.; Prats, E.; Garcia-Reyero, N.; Gómez-Canela, C.; Gómez-Oliván, L.M. Glyphosate targets fish monoaminergic systems leading to oxidative stress and anxiety. *Environ. Int.* **2021**, *146*, 106253.
24. Pereira, A.G.; Jaramillo, M.L.; Remor, A.P.; Latini, A.; Davico, C.E.; da Silva, M.L.; Müller, Y.M.; Ammar, D.; Nazari, E.M. Low-concentration exposure to glyphosate-based herbicide modulates the complexes of the mitochondrial respiratory chain and induces mitochondrial hyperpolarization in the *Danio rerio* brain. *Chemosphere* **2018**, *209*, 353-362.
25. Boutet, I.; Tanguy, A.; Moraga, D. Molecular identification and expression of two non-P450 enzymes, monoamine oxidase A and flavin-containing monooxygenase 2, involved in phase I of xenobiotic biotransformation in the Pacific oyster, *Crassostrea gigas*. *Biochim. Biophys. Acta, Gene Struct. Expression* **2004**, *1679*, 29-36.
26. Milan, M.; Dalla Rovere, G.; Smits, M.; Ferrareso, S.; Pastore, P.; Marin, M.; Bogiatti, S.; Patarnello, T.; Bargelloni, L.; Matozzo, V. Ecotoxicological effects of the herbicide glyphosate in non-target aquatic species: Transcriptional responses in the mussel *Mytilus galloprovincialis*. *Environ. Pollut.* **2018**, *237*, 442-451.

27. Marchand, J.; Tanguy, A.; Charrier, G.; Quiniou, L.; Plee-Gauthier, E.; Laroche, J. Molecular identification and expression of differentially regulated genes of the European flounder, *Platichthys flesus*, submitted to pesticide exposure. *Mar. Biotechnol.* **2006**, *8*, 275-294.
28. Doğanlar, O.; Doğanlar, Z.B.; Kurtdere, A.K.; Chasan, T.; Ok, E.S. Chronic exposure of human glioblastoma tumors to low concentrations of a pesticide mixture induced multidrug resistance against chemotherapy agents. *Ecotoxicol. Environ. Saf.* **2020**, *202*, 110940.
29. George, J.; Shukla, Y. Emptying of intracellular calcium pool and oxidative stress imbalance are associated with the glyphosate-induced proliferation in human skin keratinocytes HaCaT cells. *Int. Sch. Res. Notices* **2013**, 2013.
30. Yang, X.; Yu, X.; Sun, N.; Shi, X.; Niu, C.; Shi, A.; Cheng, Y. Glyphosate-based herbicide causes spermatogenesis disorder and spermatozoa damage of the Chinese mitten crab (*Eriocheir sinensis*) by affecting testes characteristic enzymes, antioxidant capacities and inducing apoptosis. *Toxicol. Appl. Pharmacol.* **2022**, 116086.
31. Zhang, J.-W.; Xu, D.-Q.; Feng, X.-Z. The toxic effects and possible mechanisms of glyphosate on mouse oocytes. *Chemosphere* **2019**, *237*, 124435.
32. Jiang, X.; Zhang, N.; Yin, L.; Zhang, W.-l.; Han, F.; Liu, W.-b.; Chen, H.-q.; Cao, J.; Liu, J.-y. A commercial Roundup® formulation induced male germ cell apoptosis by promoting the expression of XAF1 in adult mice. *Toxicol. Lett.* **2018**, *296*, 163-172.
33. Kim, Y.-h.; Hong, J.-r.; Gil, H.-w.; Song, H.-y.; Hong, S.-y. Mixtures of glyphosate and surfactant TN20 accelerate cell death via mitochondrial damage-induced apoptosis and necrosis. *Toxicol. In Vitro* **2013**, *27*, 191-197.
34. Woźniak, E.; Reszka, E.; Jabłońska, E.; Balcerzyk, A.; Broncel, M.; Bukowska, B. Glyphosate affects methylation in the promoter regions of selected tumor suppressors as well as expression of major cell cycle and apoptosis drivers in PBMCs (*in vitro* study). *Toxicol. In Vitro* **2020**, *63*, 104736.
35. George, J.; Prasad, S.; Mahmood, Z.; Shukla, Y. Studies on glyphosate-induced carcinogenicity in mouse skin: a proteomic approach. *J. Proteomics* **2010**, *73*, 951-964.
36. Bhardwaj, J.K.; Kumar, V.; Saraf, P.; Panchal, H.; Rathee, V.; Sachdeva, S.N. Efficacy of N-acetyl-L-cysteine against glyphosate induced oxidative stress and apoptosis in testicular germ cells preventing infertility. *J. Biochem. Mol. Toxicol.* **2022**, *36*, e22979.
37. Geret, F.; Burgeot, T.; Haure, J.; Gagnaire, B.; Renault, T.; Communal, P.-Y.; Samain, J.-F. Effects of low-dose exposure to pesticide mixture on physiological responses of the pacific oyster, *Crassostrea gigas*. *Environ. Toxicol.* **2013**, *28*, 689-699.
38. Topal, A.; Atamanalp, M.; Uçar, A.; Oruç, E.; Kocaman, E.M.; Sulukan, E.; Akdemir, F.; Beydemir, Ş.; Kılınç, N.; Erdoğan, O. Effects of glyphosate on juvenile rainbow trout (*Oncorhynchus mykiss*): Transcriptional and enzymatic analyses of antioxidant defence system, histopathological liver damage and swimming performance. *Ecotoxicol. Environ. Saf.* **2015**, *111*, 206-214.
39. Soudani, N.; Chaabane, M.; Ghorbel, I.; Elwej, A.; Boudawara, T.; Zeghal, N. Glyphosate disrupts redox status and up-regulates metallothionein I and II genes expression in the liver of adult rats. Alleviation by quercetin. *Gen. Physiol. Biophys.* **2019**, *38*, 123-134.
40. Hamdaoui, L.; Oudadesse, H.; Lefeuvre, B.; Mahmoud, A.; Naifer, M.; Badraoui, R.; Ayadi, F.; Rebai, T. Sub-chronic exposure to Kalach 360 SL, Glyphosate-based Herbicide, induced bone rarefaction in female Wistar rats. *Toxicology* **2020**, *436*, 152412.
41. de Liz Oliveira Cavalli, V.L.; Cattani, D.; CE, H.R.; Pierozan, P.; Zanatta, L.; Wilhelm Filho, D.; FR, M.B.S.; Pessoa-Pureur, R.; Zamoner, A. Roundup disrupts male reproductive functions by triggering calcium-mediated cell death in rat testis and Sertoli cells. *Free Radic. Biol. Med.* **2013**, *65*, 335-346.



42. Qiu, S.; Fu, H.; Zhou, R.; Yang, Z.; Bai, G.; Shi, B. Toxic effects of glyphosate on intestinal morphology, antioxidant capacity and barrier function in weaned piglets. *Ecotoxicol. Environ. Saf.* **2020**, *187*, 109846.
43. Coalova, I.; de Molina, M.d.C.R.; Chauhan, G. Influence of the spray adjuvant on the toxicity effects of a glyphosate formulation. *Toxicol. In Vitro* **2014**, *28*, 1306-1311.
44. Mesnage, R.; Benbrook, C.; Antoniou, M.N. Insight into the confusion over surfactant co-formulants in glyphosate-based herbicides. *Food Chem. Toxicol.* **2019**, *128*, 137-145.
45. Culbreth, M.E.; Harrill, J.A.; Freudenrich, T.M.; Mundy, W.R.; Shafer, T.J. Comparison of chemical-induced changes in proliferation and apoptosis in human and mouse neuroprogenitor cells. *Neurotoxicology* **2012**, *33*, 1499-1510.
46. Forner-Piquer, I.; Faucherre, A.; Byram, J.; Blaqui re, M.; de Bock, F.; Gamet-Payrastre, L.; Ellero-Simatos, S.; Audinat, E.; Jopling, C.; Marchi, N. Differential impact of dose-range glyphosate on locomotor behavior, neuronal activity, glio-cerebrovascular structures, and transcript regulations in zebrafish larvae. *Chemosphere* **2021**, *267*, 128986.
47. Kumar, S.; Khodoun, M.; Kettleson, E.M.; McKnight, C.; Reponen, T.; Grinshpun, S.A.; Adhikari, A. Glyphosate-rich air samples induce IL-33, TSLP and generate IL-13 dependent airway inflammation. *Toxicology* **2014**, *325*, 42-51.
48. El-Shenawy, N.S. Oxidative stress responses of rats exposed to Roundup and its active ingredient glyphosate. *Environ. Toxicol. Pharmacol.* **2009**, *28*, 379-385.
49. Mesnage, R.; Phedonos, A.; Biserni, M.; Arno, M.; Balu, S.; Corton, J.C.; Ugarte, R.; Antoniou, M.N. Evaluation of estrogen receptor alpha activation by glyphosate-based herbicide constituents. *Food Chem. Toxicol.* **2017**, *108*, 30-42.
50. Babich, R.; Ulrich, J.C.; Ekanayake, E.D.V.; Massarsky, A.; De Silva, P.M.C.; Manage, P.M.; Jackson, B.P.; Ferguson, P.L.; Di Giulio, R.T.; Drummond, I.A. Kidney developmental effects of metal-herbicide mixtures: Implications for chronic kidney disease of unknown etiology. *Environ. Int.* **2020**, *144*, 106019.
